# Supplementary material
Source: Springer Nature journal article supplement (https://www.springermedizin.de/resource/supplementary/12875_2012_809_MOESM1_ESM.pdf/9435122)
Supplement: MOESM1 [file 9435122]

## Additional file 1: Quality of Care Evaluation Framework

# Multi-disciplinary Risk Factor Assessment and Management Programme

## Structure evaluation framework

| Human Resources       |                                                                                                                                                                                                                                                                                                                                                                                                          | Target Standard<br>(% of teams) |
|-----------------------|----------------------------------------------------------------------------------------------------------------------------------------------------------------------------------------------------------------------------------------------------------------------------------------------------------------------------------------------------------------------------------------------------------|---------------------------------|
| 1                     | There <b>must</b> be designated programme coordinator(s) to oversee the RAMP at cluster level.                                                                                                                                                                                                                                                                                                           | 100%                            |
| 2                     | There <b>must</b> be a multidisciplinary team of healthcare personnel, including FM Specialist, Advanced Practice Nurse, Allied Health Professional to implement RAMP. Technical Service Assistant and General Service Assistant are required to support the operation.                                                                                                                                  | 100%                            |
| 3                     | Allied Health Professionals (e.g. Dietitians, Podiatrists, Physio-therapists etc.) <b>should</b> be accessible to patients in the programme when indicated.                                                                                                                                                                                                                                              | 70%                             |
| 4                     | RAMP team staff <b>must</b> be familiar with the programme objectives and logistics.                                                                                                                                                                                                                                                                                                                     | 100%                            |
| 5                     | RAMP team doctors and nurses <b>must</b> know the management protocol.                                                                                                                                                                                                                                                                                                                                   | 100%                            |
| 6                     | RAMP team staff <b>should</b> have undergone relevant training for this programme.                                                                                                                                                                                                                                                                                                                       | 70%                             |
| Office Infrastructure |                                                                                                                                                                                                                                                                                                                                                                                                          | Target Standard<br>(% of teams) |
| 7                     | Specific data collection forms (electronic) <b>must</b> be used for electronic documentation of patient data                                                                                                                                                                                                                                                                                             | 100%                            |
| 8                     | Professional staff of RAMP team <b>must</b> have access to the CMS system for patient data retrieval.                                                                                                                                                                                                                                                                                                    | 100%                            |
| 9                     | There <b>should</b> be appropriate space provided for the programme.                                                                                                                                                                                                                                                                                                                                     | 70%                             |
| 10                    | Facilities for patient recruitment, enrolment, assessment and RAMP sessions (e.g. intake / intervention sessions) <b>should</b> be available in the clinic.<br><u>List of essential facilities:</u><br>Fundus camera (per team)<br>Visual acuity charts<br>Monofilament and/or Biothesiometer<br>Access to laboratory service: a) renal function test, b) lipid profile, c) HbA1c, d) urine microalbumin | 70%                             |

*Running title: Evaluation of a multi-disciplinary management programme for patients with Diabetes Mellitus*

|                          |                                                                                                                                                                                          |                                   |
|--------------------------|------------------------------------------------------------------------------------------------------------------------------------------------------------------------------------------|-----------------------------------|
| 11                       | Educational materials on disease knowledge <b>must</b> be available.                                                                                                                     | 100%                              |
| Programme Management     |                                                                                                                                                                                          | Target Standard<br>(% of clinics) |
| 12                       | Patients enrolled in the programme <b>must</b> be properly documented in the CMS / OPAS.                                                                                                 | 100%                              |
| 13                       | Patient enrolment records <b>should</b> be accessible to the doctors and other authorized members of the programme.                                                                      | 100%                              |
| 14                       | The patient's doctor <b>should</b> be informed of patient's participation and RAMP classification.<br><i>Being informed [i.e. Reminder/ record in the CMS/ patient hand-held record]</i> | 70%                               |
| Organizational Structure |                                                                                                                                                                                          | Target Standard<br>(% of clinics) |
| 15                       | There <b>should</b> be regular meetings among staff of each participating team to monitor the performance of the programme.                                                              | 70%                               |
| 16                       | There <b>should</b> be regular meetings between RAMP team staff and the cluster programme coordinator(s).                                                                                | 70%                               |

## Multi-disciplinary Risk Factor Assessment and Management Programme

### Process evaluation framework

| Service Delivery & Process of Care |                                                                                                                                                                                                                                                                                                                | Target Standard<br>(% of patients, unless otherwise specified) |
|------------------------------------|----------------------------------------------------------------------------------------------------------------------------------------------------------------------------------------------------------------------------------------------------------------------------------------------------------------|----------------------------------------------------------------|
| 1                                  | DM patients with or without HT <b>should</b> enroll in the RAMP.                                                                                                                                                                                                                                               | 50%<br><br>(in the first year of operation)                    |
| 2                                  | Patients <b>must</b> be stratified into a RAMP risk group.                                                                                                                                                                                                                                                     | 100%                                                           |
| 3                                  | Patients stratified into moderate risk group <b>could</b> be referred to nurse intervention session.                                                                                                                                                                                                           | 20%                                                            |
| 4                                  | Patients stratified into high / very high risk group <b>could</b> be referred to nurse intervention session.                                                                                                                                                                                                   | 30%                                                            |
| 5                                  | Patients stratified into very high risk group and with HbA1c > 8.4% <b>should</b> be referred to AC intervention sessions.                                                                                                                                                                                     | 70%                                                            |
| 6                                  | Patients <b>could</b> be referred to patient empowerment programme (PEP).<br><i>(Only applicable to clusters with PEP)</i>                                                                                                                                                                                     | 10%                                                            |
| 7                                  | Patients <b>could</b> be referred to the dietitian.                                                                                                                                                                                                                                                            | 5%                                                             |
| 8                                  | Patients <b>could</b> be referred to the podiatrist.                                                                                                                                                                                                                                                           | 5%                                                             |
| 9                                  | Patients who smoke <b>could</b> have at least 1 appointment at the smoking counseling and cessation centres (SCCC) after joining the programme.<br><br><i>Note: Patients with appointments in SCCC could be referred from any source, or they may have already attended SCCC before joining the programme.</i> | 30%                                                            |

## Multi-disciplinary Risk Factor Assessment and Management Programme

### Outcome evaluation framework

| Clinical Outcomes                                                                                                        |                                                                                                                                                                          | Target Standard<br>(% of enrolled patients) |
|--------------------------------------------------------------------------------------------------------------------------|--------------------------------------------------------------------------------------------------------------------------------------------------------------------------|---------------------------------------------|
| 1                                                                                                                        | Patients <b>should</b> have HbA1c $\leq 7\%$ one year after the programme.<br><i>HbA1c reading one year right after the first intake assessment.</i>                     | 35%                                         |
| 2                                                                                                                        | Patients <b>could</b> have improvement in HbA1c one year after the programme.<br><i>Change in HbA1c before and one year after the first intake assessment.</i>           | P < 0.05                                    |
| 3                                                                                                                        | Patients <b>should</b> have BP $\leq 130 / 80$ mmHg one year after the programme.<br><i>Average of two BP readings one year right after the first intake assessment.</i> | 30%                                         |
| 4                                                                                                                        | Patients <b>could</b> have improvement in BP one year after the programme.<br><i>Change in both SBP and DBP before and one year after the first intake assessment.</i>   | P < 0.05                                    |
| 5                                                                                                                        | Patients <b>should</b> have LDL-C $\leq 2.6$ mmol/L one year after the programme.<br><i>LDL-C reading one year right after the first intake assessment.</i>              | 30%                                         |
| 6                                                                                                                        | Patients <b>could</b> have improvement in LDL-C one year after the programme.<br><i>Mean change in LDL-C before and one year after the first intake assessment.</i>      | P < 0.05                                    |
| Service Outcomes (Secondary Outcomes):<br>12-month utilization of HA services before and after date of first appointment |                                                                                                                                                                          | Target Standard<br>(% of patients)          |
| 7                                                                                                                        | Number of GOPC attendances <b>should</b> be decreased after the programme.                                                                                               | P < 0.05                                    |
| 8                                                                                                                        | Number of medical SOPC attendances <b>should</b> be decreased after the programme.                                                                                       | P < 0.05                                    |
| 9                                                                                                                        | Number of A&E attendances <b>should</b> be decreased after the programme.                                                                                                | P < 0.05                                    |
| 10                                                                                                                       | Number of hospital admissions <b>should</b> be decreased after the programme.                                                                                            | P < 0.05                                    |

*Running title: Evaluation of a multi-disciplinary management programme for patients with Diabetes Mellitus*

| Patient-Reported Outcomes |                                                                                                              | Target Standard<br>(% of patients) |
|---------------------------|--------------------------------------------------------------------------------------------------------------|------------------------------------|
| 11                        | Patients <b>should</b> have improvement in quality of life (Short Form-12) 6 months after the programme.     | P < 0.05                           |
| 12                        | Patients <b>should</b> have global improvement in health (Global Rating Scale) 6 months after the programme. | 70%                                |
| 13                        | Patients <b>should</b> be more enabled (Patient Enablement Instrument) 6 months after the programme.         | 70%                                |

**Note:**

All process and outcome indicators are confined to attending patients, unless otherwise specified.

| Descriptions       | Definitions                                                                                                                                                                                                                                                                     |
|--------------------|---------------------------------------------------------------------------------------------------------------------------------------------------------------------------------------------------------------------------------------------------------------------------------|
| DM patients        | Number of patients with GOPC attendances coded with ICPC-2 of 'T89' / 'T90', or with prescription of any pre-defined diabetic drugs in the reporting period. Patients attending medical SOPC with pre-defined diabetic drugs during the same period are excluded from analysis. |
| Enrolled patients  | Patients with appointments for intake assessment.                                                                                                                                                                                                                               |
| Attending patients | Patients attended at least one session of the programme.                                                                                                                                                                                                                        |

*Running title: Evaluation of a multi-disciplinary management programme for patients with Diabetes Mellitus*

RAMP Structure Criteria – Operation Definition

|                                     | Data Required                                                                                                                                                                                                                                                           | Operation Definition                                                                                                                                          |
|-------------------------------------|-------------------------------------------------------------------------------------------------------------------------------------------------------------------------------------------------------------------------------------------------------------------------|---------------------------------------------------------------------------------------------------------------------------------------------------------------|
| <b><u>Human Resources</u></b>       |                                                                                                                                                                                                                                                                         |                                                                                                                                                               |
| 1                                   | There <b>must</b> be designated programme coordinator(s) to oversee the RAMP at cluster level.                                                                                                                                                                          | Self-reported by Cluster Coordinator /Clinic Program Coordinator.                                                                                             |
| 2                                   | There <b>must</b> be a multidisciplinary team of healthcare personnel, including FM Specialist, Advanced Practice Nurse, Allied Health Professional to implement RAMP. Technical Service Assistant and General Service Assistant are required to support the operation. | Self-reported by Cluster Coordinator /Clinic Program Coordinator.<br>(Please specify the number of programme staff and their time dedicated to the programme) |
| 3                                   | Allied Health Professionals (e.g. Dietitians, Podiatrists, Physio-therapists etc.) <b>should</b> be accessible to patients in the programme when indicated.                                                                                                             | Self-reported by Cluster Coordinator /Clinic Program Coordinator.<br>(Please specify the number of programme staff and their time dedicated to the programme) |
| 4                                   | RAMP team staff <b>must</b> be familiar with the programme objectives and logistics.                                                                                                                                                                                    | Self-reported by Cluster Coordinator /Clinic Program Coordinator.<br>(Please attach a summary)                                                                |
| 5                                   | RAMP team doctors and nurses <b>must</b> know the management protocol.                                                                                                                                                                                                  | Self-reported by Cluster Coordinator /Clinic Program Coordinator.<br>(Please attach a summary)                                                                |
| 6                                   | RAMP team staff <b>should</b> have undergone relevant training for this programme.                                                                                                                                                                                      | Self-reported by Cluster Coordinator /Clinic Program Coordinator.<br>(Please specify what training has been taken)                                            |
| <b><u>Office Infrastructure</u></b> |                                                                                                                                                                                                                                                                         |                                                                                                                                                               |
| 7                                   | Specific data collection forms (electronic) <b>must</b> be used for electronic documentation of patient data.                                                                                                                                                           | Self-reported by Cluster Coordinator /Clinic Program Coordinator.<br>(please enclose a print copy or print screen of all forms)                               |
| 8                                   | Professional staff of RAMP team <b>must</b> have access to the CMS system for patient data retrieval.                                                                                                                                                                   | Self-reported by Cluster Coordinator/ Clinic Program Coordinator.<br>(Please enclose a sample copy of relevant print screens please)                          |
| 9                                   | There <b>should</b> be appropriate space provided for the                                                                                                                                                                                                               | Self-reported by Cluster Coordinator/ Clinic Program                                                                                                          |

*Running title: Evaluation of a multi-disciplinary management programme for patients with Diabetes Mellitus*

|                                        | <b>Data Required</b>                                                                                                                                       | <b>Operation Definition</b>                                                                                                                   |
|----------------------------------------|------------------------------------------------------------------------------------------------------------------------------------------------------------|-----------------------------------------------------------------------------------------------------------------------------------------------|
|                                        | programme.                                                                                                                                                 | Coordinator.                                                                                                                                  |
| 10                                     | Facilities for patient recruitment, enrolment, assessment and RAMP sessions (e.g. intake/ intervention sessions) <b>should</b> be available in the clinic. | Self-reported by Cluster Coordinator/ Clinic Program Coordinator.                                                                             |
| 11                                     | Educational materials on disease knowledge <b>must</b> be available.                                                                                       | Self-reported by Cluster Coordinator/ Clinic Program Coordinator.<br>(Please enclose a copy of relevant materials)                            |
| <b><u>Programme Management</u></b>     |                                                                                                                                                            |                                                                                                                                               |
| 12                                     | Patients enrolled in the programme <b>must</b> be properly documented in the CMS / OPAS.                                                                   | Confirm with HA support office record.<br>(Please enclose a sample copy of relevant print screens)                                            |
| 13                                     | Patient enrolment records <b>should</b> be accessible to the doctors and other authorized members of the programme.                                        | Confirm with HA support office record.                                                                                                        |
| 14                                     | The patient's doctor <b>should</b> be informed of patient's participation and RAMP classification.                                                         | Confirm with HA support office record.                                                                                                        |
| <b><u>Organizational Structure</u></b> |                                                                                                                                                            |                                                                                                                                               |
| 15                                     | There <b>should</b> be regular meetings among staff of each participating team to monitor the performance of the programme.                                | Self-reported by Cluster Coordinator/ Clinic Program Coordinator.<br>(Please specify the frequency and form of communication related to RAMP) |
| 16                                     | There <b>should</b> be regular meetings between RAMP team staff and the cluster programme coordinator(s).                                                  | Self-reported by Cluster Coordinator/ Clinic Program Coordinator.<br>(Please specify the frequency and form of communication related to RAMP) |

*Running title: Evaluation of a multi-disciplinary management programme for patients with Diabetes Mellitus*

RAMP Process Criteria – Operation Definition

| Data Required                                                                         | Operation Definition                                                                                                                                                                                                                                                            |
|---------------------------------------------------------------------------------------|---------------------------------------------------------------------------------------------------------------------------------------------------------------------------------------------------------------------------------------------------------------------------------|
| <b><u>Service delivery</u></b>                                                        |                                                                                                                                                                                                                                                                                 |
| DM patients                                                                           | Number of patients with GOPC attendances coded with ICPC-2 of 'T89' / 'T90', or with prescription of any pre-defined diabetic drugs in the reporting period. Patients attending medical SOPC with pre-defined diabetic drugs during the same period are excluded from analysis. |
| Enrolled Patients                                                                     | Patients with appointments for intake assessment.                                                                                                                                                                                                                               |
| Attended Patients                                                                     | Patients attended at least one session of the programme.                                                                                                                                                                                                                        |
| Completed Patients                                                                    | Patients who have attended all sessions of the programme                                                                                                                                                                                                                        |
| <b><u>Process of Care</u></b>                                                         |                                                                                                                                                                                                                                                                                 |
| Patients identified with additional problems and requiring referral to other services | Patients identified with problems that require referral.                                                                                                                                                                                                                        |
| Referral to additional service                                                        | The number of patients referred for additional service to have their problem treated (Denominator: Patients identified to have problems)                                                                                                                                        |
| Refusal of additional service                                                         | The number of patients who refused additional service to have their problem treated. (Denominator: Patients identified to have problems)                                                                                                                                        |

RAMP Outcomes Criteria– Operation Definition

| Data Required                   | Unit | Operation Definition                                                                                                                                                                                     |
|---------------------------------|------|----------------------------------------------------------------------------------------------------------------------------------------------------------------------------------------------------------|
| <b><u>Clinical outcomes</u></b> |      |                                                                                                                                                                                                          |
| HbA1c                           | %    | The HbA1c reading from HA information systems at reference time points (baseline: last available before date of RAMP enrolment; post 12 months: the first reading in 9 - 15 months after RAMP enrolment) |

*Running title: Evaluation of a multi-disciplinary management programme for patients with Diabetes Mellitus*

| <b>Data Required</b>                                               | <b>Unit</b> | <b>Operation Definition</b>                                                                                                                                                                                      |
|--------------------------------------------------------------------|-------------|------------------------------------------------------------------------------------------------------------------------------------------------------------------------------------------------------------------|
| Systolic BP                                                        | mmHg        | The systolic BP readings from HA information systems at reference time points (baseline: last available before date of RAMP enrolment; post 12 months: the first reading in 9 - 15 months after RAMP enrolment). |
| Diastolic BP                                                       | mmHg        | The diastolic BP readings from HA information systems at reference time points (baseline: last available before date of RAMP enrolment; post 12 months: the first reading in 9 - 15 months after RAMP enrolment) |
| LDL-C                                                              | mmol/L      | The LDL-C reading from HA information systems at reference time point (baseline: last available before date of RAMP enrolment; post 12 months: the first reading in 9 - 15 months after RAMP enrolment).         |
| RAMP risk level                                                    | -           | Latest RAMP risk level<br>(1. Low risk; 2. Medium risk;3.High risk; 4.Very high risk                                                                                                                             |
| <b><u>Service utilization Outcomes (in the past 12 months)</u></b> |             |                                                                                                                                                                                                                  |
| Hospitalization                                                    | Episodes    | Number of times the patient has been hospitalized in HA hospitals in the past 12 months                                                                                                                          |
| A&E attendance                                                     | Episodes    | Number of times the patient attended HA A&E departments in the past 12 months                                                                                                                                    |
| GOPC consultation                                                  | Episodes    | Number of times the patient went for HA GOPC consultation in the past 12 months                                                                                                                                  |
| SOPC medical consultation                                          | Episodes    | Number of times the patient went for HA SOPC (Medical) consultation in the past 12 months                                                                                                                        |
| <b><u>Patient reported outcomes</u></b>                            |             |                                                                                                                                                                                                                  |
| Health-related Quality of Life score                               | -           | Measured by the SF 12-v2 domain scores, PCS and MCS scores                                                                                                                                                       |
| Patient Enablement Instrument (PEI) score                          | -           | Measured by the mean PEI score and the proportion of subjects with PEI >0                                                                                                                                        |
| Global Rating of Change Scale (GRS)                                | -           | Measured by the mean GRS and the proportion of subjects with GRS score >0 or <0                                                                                                                                  |
